# Supplementary material for: Chemogenetic activation of adrenocortical Gq signaling causes hyperaldosteronism and disrupts functional zonation
Source: JCI journal article supplement (doi:10.1172/jci127429), 2019-11-17
Supplement: sd1 [file 1]

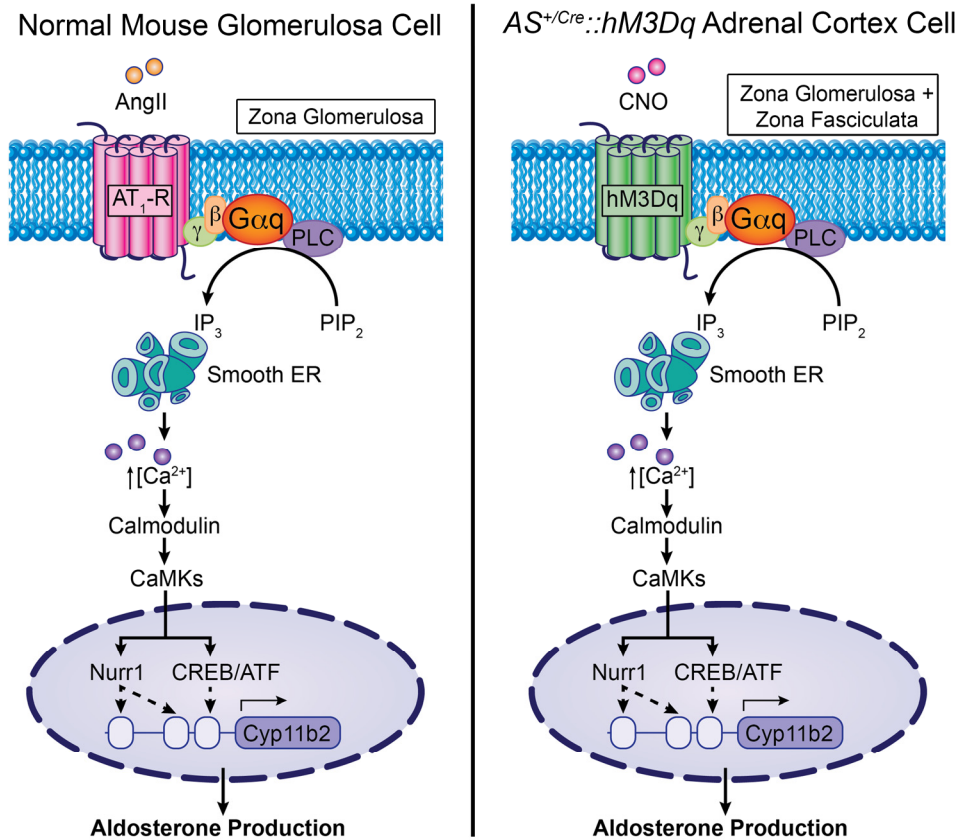

### Supplemental Figure 1. Activation of Gq signaling in both the normal and

**AS<sup>+/Cre</sup>::hM3Dq mouse adrenal cells. (A)** Angiotensin II (AngII) binding to its receptor (AT<sub>1</sub>-R) specifically on the cellular membrane of zona glomerulosa (ZG) cells activates the Gq protein family, leading to *Cyp11b2* transcription and aldosterone production. **(B)** Rationale for the use of DREADD technology. hM3Dq is a modified human muscarinic M3 receptor that binds CNO and not endogenous ligands. This receptor can couple to Gq proteins in the same manner as AT<sub>1</sub>-R and activate Gq signaling.

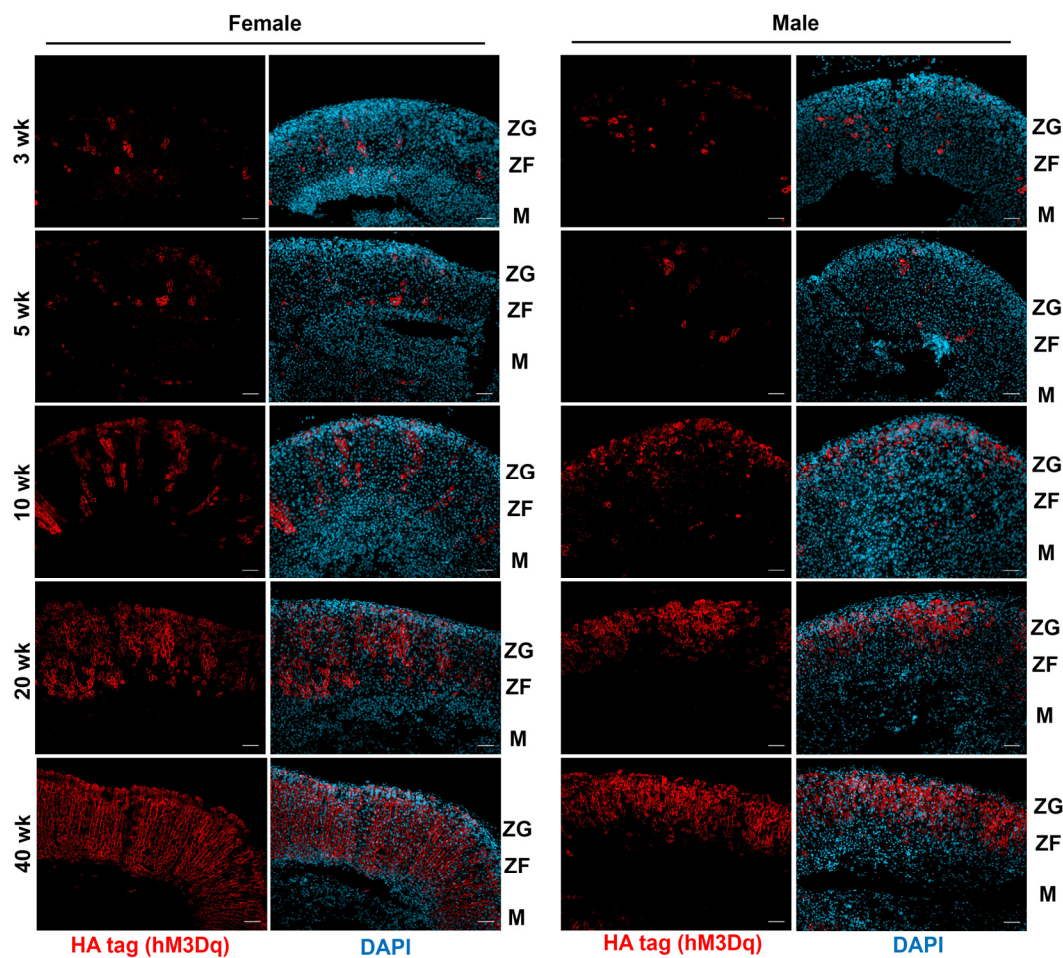

**Supplemental Figure 2. Expression of hM3Dq increases with age in the  $AS^{+/Cre}::hM3Dq$  model.** Untreated male and female  $AS^{+/Cre}::hM3Dq$  mice were sacrificed at the indicated ages and stained for HA tag (hM3Dq) (red) by immunofluorescence. DAPI (blue) marks the nuclei. ZG, zona glomerulosa; ZF, zona fasciculata; M, medulla. Scale bars = 50  $\mu$ m.

**A**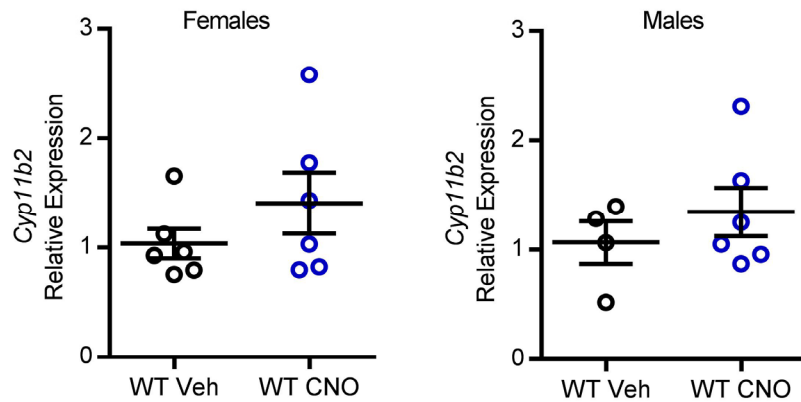**B**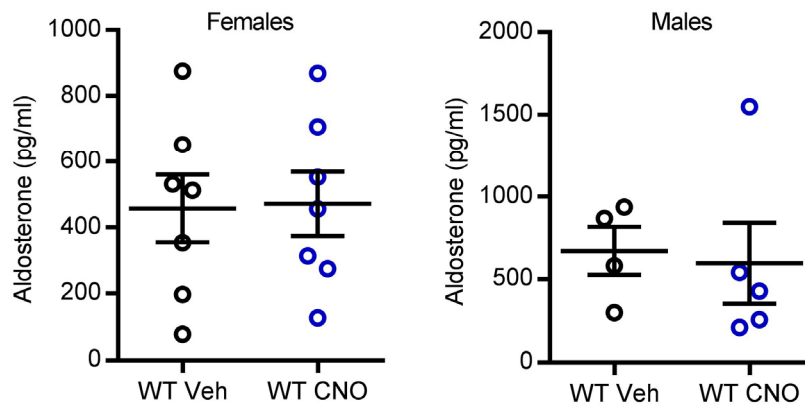

**Supplemental Figure 3. CNO treatment has no significant effect on aldosterone production in wild type mice.** Wild type mice ( $AS^{+/+}$  and either homozygous or

heterozygous for *hM3Dq*) were treated with either vehicle or CNO water for 7 days. **(A)** mRNA for whole adrenal *Cyp11b2*. **(B)** LC-MS/MS analysis of plasma aldosterone. For (A),  $n = 6$  for both female groups. In males,  $n = 4$  for Veh and  $n = 6$  for CNO. For (B), in females,  $n = 7$  for both Veh and CNO groups. In males,  $n = 4$  for Veh and  $n = 5$  for CNO. Bars in dot plots represent mean  $\pm$  SEM. WT, wild type; Veh, vehicle.

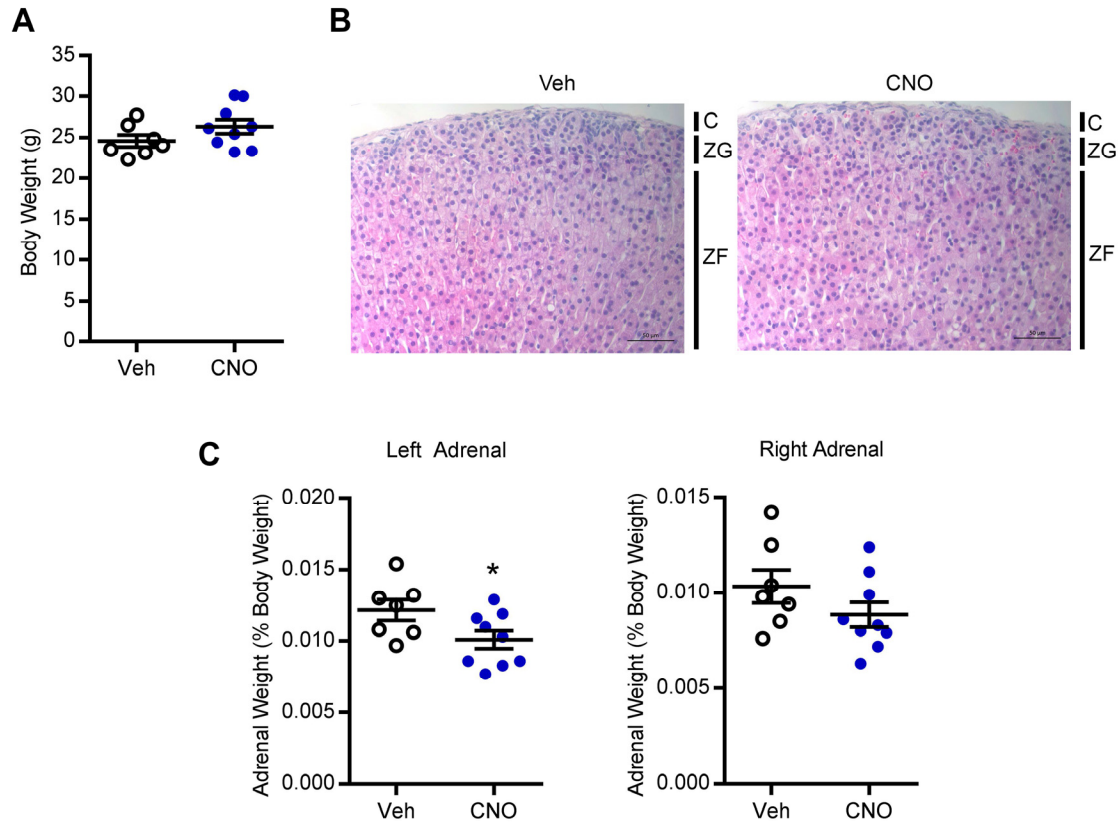

**Supplemental Figure 4. Additional phenotyping of  $AS^{+/Cre}::hM3Dq$  mice. (A)** In 20-21 week old post- treatment females, body weight was measured prior to sacrifice and showed no significant difference between CNO and vehicle. **(B)** The histology of the adrenal glands was examined by H&E staining. **(C)** Adrenal weights were measured and then normalized to each mouse's body weight as a percentage of body weight. For weights,  $n = 7$  for vehicle and  $n = 9$  for CNO. Bars in dot plots represent mean  $\pm$  SEM. C, capsule; ZG, zona glomerulosa; ZF, zona fasciculata. Scale bars =  $50\mu m$ . Statistical analysis used for dot plots was unpaired two-tailed Student's  $t$  test.  $*P < 0.05$ .

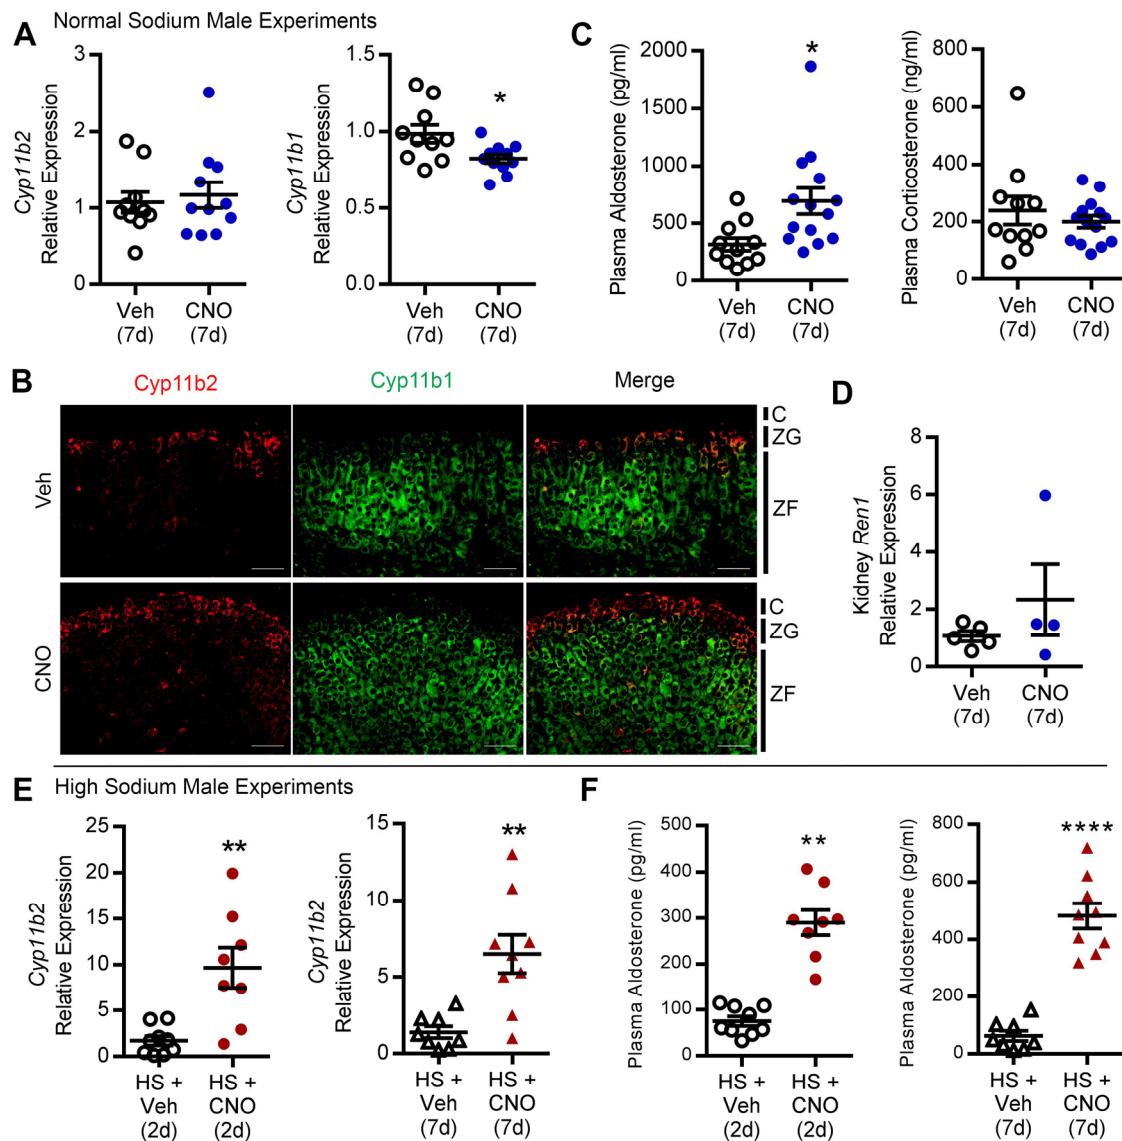

**Supplemental Figure 5. CNO treated 20 week old male  $AS^{+/Cre}::hM3Dq$  mice exhibit a moderate response in aldosterone production. (A)** Whole adrenal mRNA expression of *Cyp11b2* and *Cyp11b1* in 7 day vehicle (n = 10) or CNO treated (n = 11) males. **(B)** Immunofluorescence of *Cyp11b2* (red) and *Cyp11b1* (green) in 7 day vehicle or CNO treated males. **(C)** LC-MS/MS steroid measurements in vehicle (n = 11) and CNO treated (n = 14) males **(D)** qPCR analysis of kidney *Ren1* mRNA expression in

vehicle (n = 5) and CNO treated (n = 4) male mice. **(E)** High sodium diet plus CNO *Cyp11b2* expression. 20-22 week old male mice were treated under the same 2 day and 7 day protocols described in Figure 4. **(F)** HS + CNO plasma aldosterone concentration. For 2 and 7 day experiments, n = 9 for both HS + vehicle (2d) and HS + CNO (7d), and n = 8 for both HS + CNO (2d) and HS + vehicle (7d). Bars in dot plots represent mean  $\pm$  SEM. C, capsule; ZG, zona glomerulosa; ZF, zona fasciculata; Veh, vehicle; 2d, 2 days; 7d, 7 days. Scale bars = 50  $\mu$ m. Statistical analysis used for dot plots was unpaired two-tailed Student's *t* test. \**P* < 0.05, \*\**P* < 0.01, \*\*\*\**P* < 0.0001.

| Sex | Treatment     | <i>n</i> | 11DOC (ng/ml) | Corticosterone (ng/ml) | 18OHB (pg/ml)     | Aldosterone (pg/ml) |
|-----|---------------|----------|---------------|------------------------|-------------------|---------------------|
| F   | Veh (7d)      | 13       | 19.3 ± 3.3    | 342.0 ± 95.1           | 987.2 ± 145.0     | 418.8 ± 58.3        |
|     | CNO (7d)      | 17       | 19.9 ± 4.3    | 243.4 ± 25.9           | 2544.5 ± 620.9*   | 1302.4 ± 265.1**    |
|     | HS + Veh (2d) | 8        | 26.4 ± 7.2    | 288.8 ± 42.8           | 273.7 ± 54.3      | 108.8 ± 30.0        |
|     | HS + CNO (2d) | 8        | 11.9 ± 4.5    | 230.3 ± 36.4           | 488.6 ± 68.5*     | 285.8 ± 44.9**      |
|     | HS + Veh (7d) | 8        | 39.4 ± 9.7    | 356.4 ± 42.3           | 110.5 ± 20.4      | 18.5 ± 5.6          |
|     | HS + CNO (7d) | 10       | 20.0 ± 5.0    | 305.0 ± 28.4           | 3655.3 ± 1046.0** | 1935.2 ± 461.3**    |
| M   | Veh (7d)      | 11       | 12.4 ± 2.8    | 239.6 ± 48.5           | 641.2 ± 128.4     | 318.2 ± 56.1        |
|     | CNO (7d)      | 14       | 10.2 ± 2.3    | 200.5 ± 20.8           | 1140.5 ± 166.7*   | 696.1 ± 113.6*      |
|     | HS + Veh (2d) | 9        | 23.5 ± 5.2    | 212.0 ± 27.0           | 179.5 ± 17.5      | 75.1 ± 10.2         |
|     | HS + CNO (2d) | 8        | 6.0 ± 2.6*    | 147.4 ± 22.2           | 466.6 ± 42.7****  | 289.9 ± 27.6****    |
|     | HS + Veh (7d) | 8        | 8.8 ± 2.3     | 202.5 ± 26.5           | 170.2 ± 55.0      | 62.8 ± 17.5         |
|     | HS + CNO (7d) | 9        | 6.9 ± 2.4     | 210.4 ± 30.8           | 699.7 ± 62.6****  | 481.9 ± 44.0****    |

**Supplemental Table 1. Concentrations of adrenal steroids in *AS<sup>+/Cre</sup>::hM3Dq* under various treatment protocols.**

LC-MS/MS was performed to quantify steroids in mouse plasma from the various treatment protocols. Data for Veh/CNO (7d) corticosterone is presented as dot plots in Figure 4 and Supplemental Figure 4. Data for aldosterone under all conditions is presented as dot plots in Figures 2 and 4, and Supplemental Figure 4. Data is represented as mean ± SEM.

Unpaired two-tailed Student's t-test was performed within each sex/treatment regimen group. \* $P < 0.05$ , \*\* $P < 0.01$ , \*\*\*\* $P < 0.0001$ . F, female; M, male; 11DOC, 11-deoxycorticosterone; 18OHB, 18-hydroxycorticosterone; HS, high sodium; Veh, vehicle; 2d, 2 days; 7d, 7 days



| Steroid | Steroid Manufacturer | Precursor/Product Ions (m/z) | RT (min) | LOD (pg/ml) | Internal Standard       | Internal Standard Manufacturer |
|---------|----------------------|------------------------------|----------|-------------|-------------------------|--------------------------------|
| 11DOC   | Cerilliant           | 331.2 / 109.0                | 8.6      | 11.2        | 11DOC-d <sub>8</sub>    | Sigma-Aldrich                  |
| B       | Cerilliant           | 347.2 / 329.2                | 6.8      | 44.4        | B-d <sub>8</sub>        | C/D/N Isotopes                 |
| 18OHB   | Cerilliant           | 363.2 / 269.3                | 4.7      | 23.0        | Cortisol-d <sub>4</sub> | Cerilliant                     |
| Aldo    | Cerilliant           | 361.2 / 343.1                | 5.6      | 3.0         | Aldo-d <sub>8</sub>     | Sigma-Aldrich                  |

**Supplemental Table 2. Steroids standards used for LC-MS/MS.** m/z, mass to charge ratio; RT, retention time; LOD, limit of detection (calculated by measuring a signal-to-noise ratio of 3). Steroid abbreviations: 11DOC, 11-deoxycorticosterone; B, corticosterone; 18OHB, 18-hydroxycorticosterone; Aldo, aldosterone.

**(A) 1260 HPLC Pump - C4 loading column**Mobile Phase A: 0.2 mmol/L Ammonium fluoride (NH<sub>4</sub>F)Mobile Phase B: Methanol + 0.2 mmol/L NH<sub>4</sub>F

| Time (min) | A (%) | B (%) | Flow (mL/min) | Pressure (bar) |
|------------|-------|-------|---------------|----------------|
| <b>Δ4</b>  |       |       |               |                |
| 1.00       | 81.0  | 19.0  | 0.500         | 435            |
| 1.20       | 0.0   | 100.0 | 0.500         | 435            |
| 2.50       | 0.0   | 100.0 | 0.500         | 435            |
| 2.51       | 0.0   | 100.0 | 0.000         | 435            |
| 3.90       | 0.0   | 100.0 | 0.000         | 435            |
| 3.91       | 0.0   | 100.0 | 0.100         | 435            |
| 7.20       | 0.0   | 100.0 | 0.100         | 435            |
| 7.40       | 0.0   | 100.0 | 0.100         | 435            |
| 7.41       | 0.0   | 100.0 | 0.500         | 435            |
| 8.99       | 0.0   | 100.0 | 0.500         | 435            |
| 9.00       | 81.0  | 19.0  | 0.500         | 435            |
| 12.00      | 81.0  | 19.0  | 0.500         | 435            |
| 12.10      | 81.0  | 19.0  | 0.500         | 435            |

**(B) 1290 HPLC Pump - Biphenyl resolution column**Mobile Phase A: 0.2 mmol/L Ammonium fluoride (NH<sub>4</sub>F)Mobile Phase B: Methanol + 0.2 mmol/L NH<sub>4</sub>F

| Time (min) | A (%) | B (%) | Flow (mL/min) | Pressure (bar) |
|------------|-------|-------|---------------|----------------|
| <b>Δ4</b>  |       |       |               |                |
| 0.99       | 81.0  | 19.0  | 0.500         | 480            |
| 1.00       | 55.0  | 45.0  | 0.500         | 480            |
| 1.80       | 55.0  | 45.0  | 0.500         | 480            |
| 2.00       | 40.0  | 60.0  | 0.200         | 480            |
| 3.01       | 40.0  | 60.0  | 0.200         | 480            |
| 7.50       | 23.0  | 77.0  | 0.200         | 460            |
| 8.90       | 23.0  | 77.0  | 0.200         | 460            |
| 9.80       | 10.0  | 90.0  | 0.700         | 600            |
| 10.20      | 0.0   | 100.0 | 0.700         | 600            |
| 11.20      | 0.0   | 100.0 | 0.700         | 600            |
| 11.30      | 81.0  | 19.0  | 0.700         | 600            |
| 11.50      | 81.0  | 19.0  | 0.500         | 600            |

**Supplemental Table 3. Gradient specifications of the Agilent LC system. (A) 1260**

HPLC Pump - C4 loading column (B) 1290 HPLC Pump - Biphenyl resolution column.
